# Supplementary material
Source: publisher figshare collection journal article supplement (https://acs.figshare.com/ndownloader/files/5757105)
Supplement: Supplementary file 1 [file 5757105]

# ja972804t.cif

data_11Me-MPA
#------------------------------------------------------------------------------
_computing_data_collection
;
Rigaku/AFC Diffractometer Control (MSC, 1988)
;
_computing_cell_refinement
;
Rigaku/AFC Diffractometer Control (MSC, 1988)
;
_computing_data_reduction             'teXsan (MSC, 1993)'
_computing_structure_solution         'SIR92'
_computing_structure_refinement       'teXsan (MSC, 1993)'
#------------------------------------------------------------------------------
_chemical_formula_weight               238.29
_chemical_formula_sum                  'C15 H14 N2 O '
_chemical_formula_moiety               'C15 H14 N2 O '
#------------------------------------------------------------------------------
_cell_length_a                         8.397(1)
_cell_length_b                         12.957(1)
_cell_length_c                         11.823(2)
_cell_angle_alpha                      90
_cell_angle_beta                       104.32(1)
_cell_angle_gamma                      90
_cell_volume                           1246.3(3)
_cell_formula_units_Z                  4
_cell_measurement_temperature          293.2
_cell_measurement_reflns_used          25
_cell_measurement_theta_min            38.6
_cell_measurement_theta_max            40.0
#------------------------------------------------------------------------------
_symmetry_cell_setting                 monoclinic
_symmetry_space_group_name_H-M        'P 21/c     '
_symmetry_Int_Tables_number            14
_symmetry_space_group_name_Hall       '-P 2ybc'
loop_
_symmetry_equiv_pos_as_xyz
  '   +x,   +y,   +z'
  '   -x,1/2+y,1/2-z'
  '   -x,   -y,   -z'
  '   +x,1/2-y,1/2+z'
#------------------------------------------------------------------------------
_exptl_crystal_description            'prismatic'
_exptl_crystal_colour                 'colorless'
_exptl_crystal_size_max                0.600
_exptl_crystal_size_mid                0.500
_exptl_crystal_size_min                0.200
_exptl_crystal_density_diffrn          1.270
_exptl_crystal_F_000                   504.00
_exptl_absorpt_coefficient_mu          0.645
_exptl_absorpt_correction_type        '\y scans(North,Phillips & Mathews,1968)'
_exptl_absorpt_correction_T_max        1.000
_exptl_absorpt_correction_T_min        0.682
#------------------------------------------------------------------------------
_diffrn_ambient_temperature            293.2
_diffrn_radiation_wavelength           1.5418
_diffrn_radiation_type                'Cu K\a'
_diffrn_radiation_source              'Rigaku rotating anode'
_diffrn_radiation_monochromator       'Ni filter'
_diffrn_radiation_detector            'scintillation counter'
_diffrn_measurement_device            'Rigaku AFC7R'
_diffrn_measurement_method             \w-2\q

_diffrn_standards_number              3
_diffrn_standards_interval_count      150
_diffrn_standards_decay_%             3.35
loop_
_diffrn_standard_refln_index_h
_diffrn_standard_refln_index_k
_diffrn_standard_refln_index_l
     -1      -2      2
     -2      -1      1
     -2       1      1
_diffrn_reflns_number                  2108
_reflns_number_total                   1962
_reflns_number_observed                1645
_reflns_observed_criterion             >3.0sigma(I)
_diffrn_reflns_av_R_equivalents        0.0338
_diffrn_reflns_av_sigmaI/netI          0.027
_diffrn_reflns_limit_h_min             0
_diffrn_reflns_limit_h_max             9
_diffrn_reflns_limit_k_min             0
_diffrn_reflns_limit_k_max             14
_diffrn_reflns_limit_l_min             -13
_diffrn_reflns_limit_l_max             12
_diffrn_reflns_theta_min               3.41
_diffrn_reflns_theta_max               60.06
_diffrn_reflns_reduction_process      'Lp corrections applied'
_diffrn_orient_matrix_UB_11           -0.10142
_diffrn_orient_matrix_UB_12           -0.01455
_diffrn_orient_matrix_UB_13            0.02723
_diffrn_orient_matrix_UB_21            0.06271
_diffrn_orient_matrix_UB_22           -0.05045
_diffrn_orient_matrix_UB_23            0.05829
_diffrn_orient_matrix_UB_31            0.02984
_diffrn_orient_matrix_UB_32            0.05657
_diffrn_orient_matrix_UB_33            0.05899
#------------------------------------------------------------------------------
loop_
_atom_type_symbol
_atom_type_oxidation_number
_atom_type_number_in_cell
_atom_type_scat_dispersion_real
_atom_type_scat_dispersion_imag
_atom_type_scat_source
  C  0    60 0.018 0.009 
;International Tables for Crystallography
(1992, Vol. C, Tables 4.2.6.8 and 6.1.1.1)
;
  H  0    56 0.000 0.000 
;International Tables for Crystallography
(1992, Vol. C, Table 6.1.1.2)
;
  N  0     8 0.031 0.018 
;International Tables for Crystallography
(1992, Vol. C, Tables 4.2.6.8 and 6.1.1.1)
;
  O  0     4 0.049 0.032 
;International Tables for Crystallography
(1992, Vol. C, Tables 4.2.6.8 and 6.1.1.1)
;
#------------------------------------------------------------------------------
loop_
_atom_site_label
_atom_site_fract_x
_atom_site_fract_y
_atom_site_fract_z
_atom_site_U_iso_or_equiv
_atom_site_thermal_displace_type
_atom_site_calc_flag
_atom_site_calc_attached_atom
_atom_site_occupancy
_atom_site_refinement_flags
 O16    0.1570(2)   0.7643(1)   0.1683(1)   0.0638(4)   Uani d . 1.00 .
 N1     0.5057(2)   1.0494(1)   0.2355(2)   0.0567(5)   Uani d . 1.00 .
 N7     0.2424(2)   0.7983(1)   0.3608(1)   0.0455(4)   Uani d . 1.00 .
 C2     0.4041(3)   1.1025(2)   0.1514(2)   0.0650(7)   Uani d . 1.00 .
 C3     0.2468(3)   1.0718(2)   0.0978(2)   0.0689(7)   Uani d . 1.00 .
 C4     0.1922(3)   0.9810(2)   0.1321(2)   0.0590(6)   Uani d . 1.00 .
 C5     0.2935(2)   0.9234(1)   0.2210(1)   0.0450(5)   Uani d . 1.00 .
 C6     0.2261(2)   0.8213(1)   0.2485(2)   0.0448(5)   Uani d . 1.00 .
 C8     0.3280(2)   0.8690(1)   0.4532(2)   0.0464(5)   Uani d . 1.00 .
 C9     0.5092(2)   0.8676(1)   0.4617(1)   0.0457(5)   Uani d . 1.00 .
 C10    0.6172(3)   0.8248(2)   0.5592(2)   0.0603(6)   Uani d . 1.00 .
 C11    0.7824(3)   0.8218(2)   0.5660(2)   0.0707(7)   Uani d . 1.00 .
 C12    0.8416(3)   0.8595(2)   0.4760(2)   0.0706(7)   Uani d . 1.00 .
 C13    0.7380(2)   0.9021(2)   0.3759(2)   0.0584(6)   Uani d . 1.00 .
 C14    0.5690(2)   0.9080(1)   0.3702(2)   0.0453(5)   Uani d . 1.00 .
 C15    0.4511(2)   0.9605(1)   0.2719(2)   0.0441(5)   Uani d . 1.00 .
 C17    0.1900(4)   0.6979(2)   0.3921(2)   0.0625(7)   Uani d . 1.00 .
 C18    0.8143(4)   0.9379(3)   0.2806(3)   0.087(1)    Uani d . 1.00 .
 H1     0.454(3)    1.172(3)    0.126(3)    0.100(9)    Uiso calc . 1.00 .
 H2     0.176(3)    1.122(2)    0.034(2)    0.084(8)    Uiso calc . 1.00 .
 H3     0.084(4)    0.951(2)    0.096(3)    0.090(8)    Uiso calc . 1.00 .
 H4     0.280(2)    0.939(2)    0.432(2)    0.049(5)    Uiso calc . 1.00 .
 H5     0.305(2)    0.848(2)    0.525(2)    0.054(5)    Uiso calc . 1.00 .
 H6     0.568(3)    0.797(2)    0.622(2)    0.070(7)    Uiso calc . 1.00 .
 H7     0.869(4)    0.788(2)    0.638(3)    0.095(8)    Uiso calc . 1.00 .
 H8     0.951(3)    0.854(2)    0.486(2)    0.072(7)    Uiso calc . 1.00 .
 H9     0.216(4)    0.642(3)    0.348(3)    0.11(1)     Uiso calc . 1.00 .
 H10    0.273(5)    0.675(3)    0.451(4)    0.12(1)     Uiso calc . 1.00 .
 H11    0.096(5)    0.697(3)    0.422(4)    0.12(1)     Uiso calc . 1.00 .
 H12    0.741(5)    0.923(3)    0.197(4)    0.13(1)     Uiso calc . 1.00 .
 H13    0.912(5)    0.909(3)    0.284(3)    0.11(1)     Uiso calc . 1.00 .
 H14    0.843(4)    1.010(3)    0.301(3)    0.092(9)    Uiso calc . 1.00 .

loop_
_atom_site_aniso_label
_atom_site_aniso_U_11
_atom_site_aniso_U_22
_atom_site_aniso_U_33
_atom_site_aniso_U_12
_atom_site_aniso_U_13
_atom_site_aniso_U_23
 O(16)  0.0676(9)   0.0710(9)   0.0486(8)   -0.0250(7)  0.0061(6)   -0.0133(7) 
 N(1)   0.0581(9)   0.0461(9)   0.068(1)    -0.0043(7)  0.0202(8)   0.0051(7)  
 N(7)   0.0459(9)   0.0454(8)   0.0467(9)   -0.0060(6)  0.0140(7)   -0.0044(6) 
 C(2)   0.073(1)    0.053(1)    0.072(1)    0.001(1)    0.024(1)    0.014(1)   
 C(3)   0.076(1)    0.064(1)    0.063(1)    0.008(1)    0.008(1)    0.018(1)   
 C(4)   0.054(1)    0.065(1)    0.051(1)    0.0007(10)  0.0009(9)   0.0080(9)  
 C(5)   0.048(1)    0.0459(10)  0.0413(10)  0.0013(7)   0.0107(8)   -0.0011(7) 
 C(6)   0.0391(9)   0.051(1)    0.044(1)    -0.0034(7)  0.0089(8)   -0.0036(7) 
 C(8)   0.053(1)    0.047(1)    0.0389(10)  0.0011(8)   0.0126(8)   -0.0050(8) 
 C(9)   0.051(1)    0.0395(10)  0.0429(10)  0.0046(7)   0.0040(8)   -0.0084(7) 
 C(10)  0.073(1)    0.052(1)    0.049(1)    0.0092(10)  0.001(1)    -0.0077(9) 
 C(11)  0.064(1)    0.063(1)    0.073(2)    0.017(1)    -0.008(1)   -0.008(1)  
 C(12)  0.044(1)    0.062(1)    0.097(2)    0.010(1)    0.000(1)    -0.011(1)  
 C(13)  0.045(1)    0.047(1)    0.082(1)    0.0018(8)   0.0134(10)  -0.0089(9) 
 C(14)  0.0430(10)  0.0377(9)   0.053(1)    -0.0004(7)  0.0069(8)   -0.0070(7) 
 C(15)  0.0457(10)  0.0394(9)   0.049(1)    0.0004(7)   0.0154(8)   -0.0044(7) 
 C(17)  0.078(2)    0.050(1)    0.067(1)    -0.010(1)   0.033(1)    -0.001(1)  
 C(18)  0.052(1)    0.095(2)    0.121(3)    0.009(1)    0.038(2)    0.016(2)   
#------------------------------------------------------------------------------
_refine_ls_structure_factor_coef       F
_refine_ls_matrix_type                 full
_refine_ls_weighting_scheme            'w = 1/[\s^2^(Fo) + 0.00160|Fo|^2^]'
_refine_ls_hydrogen_treatment          refall
_refine_ls_extinction_method           
;
Zachariasen(1967) type 2 Gaussian isotropic
;
_refine_ls_extinction_coef             0.00000
_refine_ls_number_reflns               1645
_refine_ls_number_parameters           220
_refine_ls_number_restraints           0
_refine_ls_number_constraints          0
_refine_ls_R_factor_all                0.0518
_refine_ls_R_factor_obs                0.0471
_refine_ls_wR_factor_all               0.0832
_refine_ls_wR_factor_obs               0.0779
_refine_ls_goodness_of_fit_all         1.641
_refine_ls_goodness_of_fit_obs         1.631
_refine_ls_shift/esd_max               0.0000
_refine_ls_shift/esd_mean              0.0000
_refine_diff_density_min               -0.14
_refine_diff_density_max               0.22
#------------------------------------------------------------------------------
loop_
_geom_bond_atom_site_label_1
_geom_bond_atom_site_label_2
_geom_bond_distance
_geom_bond_site_symmetry_1
_geom_bond_site_symmetry_2
_geom_bond_publ_flag
 O(16)     C(6)      1.228(2)   1_555 1_555 no
 N(1)      C(2)      1.331(3)   1_555 1_555 no
 N(1)      C(15)     1.349(2)   1_555 1_555 no
 N(7)      C(6)      1.334(2)   1_555 1_555 no
 N(7)      C(8)      1.469(2)   1_555 1_555 no
 N(7)      C(17)     1.451(3)   1_555 1_555 no
 C(2)      C(3)      1.374(3)   1_555 1_555 no
 C(2)      H(1)      1.07(3)    1_555 1_555 no
 C(3)      C(4)      1.361(3)   1_555 1_555 no
 C(3)      H(2)      1.06(3)    1_555 1_555 no
 C(4)      C(5)      1.393(3)   1_555 1_555 no
 C(4)      H(3)      0.98(3)    1_555 1_555 no
 C(5)      C(6)      1.506(3)   1_555 1_555 no
 C(5)      C(15)     1.397(3)   1_555 1_555 no
 C(8)      C(9)      1.500(3)   1_555 1_555 no
 C(8)      H(4)      1.00(2)    1_555 1_555 no
 C(8)      H(5)      0.96(2)    1_555 1_555 no
 C(9)      C(10)     1.393(3)   1_555 1_555 no
 C(9)      C(14)     1.403(3)   1_555 1_555 no
 C(10)     C(11)     1.370(3)   1_555 1_555 no
 C(10)     H(6)      1.00(3)    1_555 1_555 no
 C(11)     C(12)     1.371(4)   1_555 1_555 no
 C(11)     H(7)      1.07(3)    1_555 1_555 no
 C(12)     C(13)     1.397(3)   1_555 1_555 no
 C(12)     H(8)      0.90(3)    1_555 1_555 no
 C(13)     C(14)     1.406(3)   1_555 1_555 no
 C(13)     C(18)     1.501(4)   1_555 1_555 no
 C(14)     C(15)     1.490(3)   1_555 1_555 no
 C(17)     H(9)      0.95(4)    1_555 1_555 no
 C(17)     H(10)     0.91(4)    1_555 1_555 no
 C(17)     H(11)     0.94(4)    1_555 1_555 no
 C(18)     H(12)     1.04(4)    1_555 1_555 no
 C(18)     H(13)     0.89(4)    1_555 1_555 no
 C(18)     H(14)     0.98(3)    1_555 1_555 no
#------------------------------------------------------------------------------
loop_
_geom_angle_atom_site_label_1
_geom_angle_atom_site_label_2
_geom_angle_atom_site_label_3
_geom_angle
_geom_angle_site_symmetry_1
_geom_angle_site_symmetry_2
_geom_angle_site_symmetry_3
_geom_angle_publ_flag
   C(2)      N(1)      C(15)     118.3(2)   1_555 1_555 1_555 no
   C(6)      N(7)      C(8)      120.8(1)   1_555 1_555 1_555 no
   C(6)      N(7)      C(17)     119.5(2)   1_555 1_555 1_555 no
   C(8)      N(7)      C(17)     119.5(2)   1_555 1_555 1_555 no
   N(1)      C(2)      C(3)      124.1(2)   1_555 1_555 1_555 no
   N(1)      C(2)      H(1)      114(1)     1_555 1_555 1_555 no
   C(3)      C(2)      H(1)      120(1)     1_555 1_555 1_555 no
   C(2)      C(3)      C(4)      117.9(2)   1_555 1_555 1_555 no
   C(2)      C(3)      H(2)      117(1)     1_555 1_555 1_555 no
   C(4)      C(3)      H(2)      124(1)     1_555 1_555 1_555 no
   C(3)      C(4)      C(5)      120.0(2)   1_555 1_555 1_555 no
   C(3)      C(4)      H(3)      123(1)     1_555 1_555 1_555 no
   C(5)      C(4)      H(3)      116(1)     1_555 1_555 1_555 no
   C(4)      C(5)      C(6)      116.2(2)   1_555 1_555 1_555 no
   C(4)      C(5)      C(15)     118.6(2)   1_555 1_555 1_555 no
   C(6)      C(5)      C(15)     125.1(2)   1_555 1_555 1_555 no
   O(16)     C(6)      N(7)      123.1(2)   1_555 1_555 1_555 no
   O(16)     C(6)      C(5)      119.5(2)   1_555 1_555 1_555 no
   N(7)      C(6)      C(5)      117.4(1)   1_555 1_555 1_555 no
   N(7)      C(8)      C(9)      110.2(1)   1_555 1_555 1_555 no
   N(7)      C(8)      H(4)      106(1)     1_555 1_555 1_555 no
   N(7)      C(8)      H(5)      108(1)     1_555 1_555 1_555 no
   C(9)      C(8)      H(4)      111(1)     1_555 1_555 1_555 no
   C(9)      C(8)      H(5)      111(1)     1_555 1_555 1_555 no
   H(4)      C(8)      H(5)      108(1)     1_555 1_555 1_555 no
   C(8)      C(9)      C(10)     120.2(2)   1_555 1_555 1_555 no
   C(8)      C(9)      C(14)     119.6(2)   1_555 1_555 1_555 no
   C(10)     C(9)      C(14)     120.2(2)   1_555 1_555 1_555 no
   C(9)      C(10)     C(11)     120.1(2)   1_555 1_555 1_555 no
   C(9)      C(10)     H(6)      116(1)     1_555 1_555 1_555 no
   C(11)     C(10)     H(6)      123(1)     1_555 1_555 1_555 no
   C(10)     C(11)     C(12)     120.1(2)   1_555 1_555 1_555 no
   C(10)     C(11)     H(7)      122(1)     1_555 1_555 1_555 no
   C(12)     C(11)     H(7)      117(1)     1_555 1_555 1_555 no
   C(11)     C(12)     C(13)     121.9(2)   1_555 1_555 1_555 no
   C(11)     C(12)     H(8)      114(1)     1_555 1_555 1_555 no
   C(13)     C(12)     H(8)      123(1)     1_555 1_555 1_555 no
   C(12)     C(13)     C(14)     118.2(2)   1_555 1_555 1_555 no
   C(12)     C(13)     C(18)     117.8(2)   1_555 1_555 1_555 no
   C(14)     C(13)     C(18)     124.0(2)   1_555 1_555 1_555 no
   C(9)      C(14)     C(13)     119.5(2)   1_555 1_555 1_555 no
   C(9)      C(14)     C(15)     118.4(2)   1_555 1_555 1_555 no
   C(13)     C(14)     C(15)     122.1(2)   1_555 1_555 1_555 no
   N(1)      C(15)     C(5)      121.1(2)   1_555 1_555 1_555 no
   N(1)      C(15)     C(14)     115.2(1)   1_555 1_555 1_555 no
   C(5)      C(15)     C(14)     123.8(2)   1_555 1_555 1_555 no
   N(7)      C(17)     H(9)      114(2)     1_555 1_555 1_555 no
   N(7)      C(17)     H(10)     105(2)     1_555 1_555 1_555 no
   N(7)      C(17)     H(11)     116(2)     1_555 1_555 1_555 no
   H(9)      C(17)     H(10)     86(3)      1_555 1_555 1_555 no
   H(9)      C(17)     H(11)     121(2)     1_555 1_555 1_555 no
   H(10)     C(17)     H(11)     105(3)     1_555 1_555 1_555 no
   C(13)     C(18)     H(12)     113(2)     1_555 1_555 1_555 no
   C(13)     C(18)     H(13)     113(2)     1_555 1_555 1_555 no
   C(13)     C(18)     H(14)     103(1)     1_555 1_555 1_555 no
   H(12)     C(18)     H(13)     106(3)     1_555 1_555 1_555 no
   H(12)     C(18)     H(14)     117(2)     1_555 1_555 1_555 no
   H(13)     C(18)     H(14)     102(2)     1_555 1_555 1_555 no
#------------------------------------------------------------------------------


data_11Me-MMPA+
#------------------------------------------------------------------------------
_computing_data_collection
;
Rigaku/AFC Diffractometer Control (MSC, 1988)
;
_computing_cell_refinement
;
Rigaku/AFC Diffractometer Control (MSC, 1988)
;
_computing_data_reduction             'teXsan (MSC, 1993)'
_computing_structure_solution         'SHELXS86'
_computing_structure_refinement       'teXsan (MSC, 1993)'
#------------------------------------------------------------------------------
_chemical_formula_weight               429.37
_chemical_formula_sum                  'C16 H17 Br I0.50 N2 O Zn0.50 '
_chemical_formula_moiety               
;
C16 H17 N2 O 1+, 0.5(I 1-), 0.25(Zn Br4 2-)
;
#------------------------------------------------------------------------------
_cell_length_a                         28.480(6)
_cell_length_b                         10.205(5)
_cell_length_c                         26.793(5)
_cell_angle_alpha                      90
_cell_angle_beta                       123.07(1)
_cell_angle_gamma                      90
_cell_volume                           6526(3)
_cell_formula_units_Z                  16
_cell_measurement_temperature          298.2
_cell_measurement_reflns_used          25
_cell_measurement_theta_min            20.1
_cell_measurement_theta_max            24.2
#------------------------------------------------------------------------------
_symmetry_cell_setting                 monoclinic
_symmetry_space_group_name_H-M        'C 2/c      '
_symmetry_Int_Tables_number            15
_symmetry_space_group_name_Hall       '-C 2yc'
loop_
_symmetry_equiv_pos_as_xyz
  '   +x,   +y,   +z'
  '   +x,   +y,   +z'
  '   -x,   +y,1/2-z'
  '   -x,   +y,1/2-z'
  '   -x,   -y,   -z'
  '   -x,   -y,   -z'
  '   +x,   -y,1/2+z'
  '   +x,   -y,1/2+z'
#------------------------------------------------------------------------------
_exptl_crystal_description            'prismatic'
_exptl_crystal_colour                 'yellow'
_exptl_crystal_size_max                0.300
_exptl_crystal_size_mid                0.200
_exptl_crystal_size_min                0.150
_exptl_crystal_density_diffrn          1.748
_exptl_crystal_F_000                   3384.00
_exptl_absorpt_coefficient_mu          11.620
_exptl_absorpt_correction_type        '\y scans(North,Phillips & Mathews,1968)'
_exptl_absorpt_correction_T_max        1.000
_exptl_absorpt_correction_T_min        0.719
#------------------------------------------------------------------------------
_diffrn_ambient_temperature            298.2
_diffrn_radiation_wavelength           1.5418
_diffrn_radiation_type                'Cu K\a'
_diffrn_radiation_source              'Rigaku rotating anode'
_diffrn_radiation_monochromator       'Ni filter'
_diffrn_radiation_detector            'scintillation counter'
_diffrn_measurement_device            'Rigaku AFC7R'
_diffrn_measurement_method             \w-2\q

_diffrn_standards_number              3
_diffrn_standards_interval_count      150
_diffrn_standards_decay_%             1.63
loop_
_diffrn_standard_refln_index_h
_diffrn_standard_refln_index_k
_diffrn_standard_refln_index_l
      0       2     -4
     -4       2     -2
     -1       3     -3
_diffrn_reflns_number                  6384
_reflns_number_total                   6247
_reflns_number_observed                3614
_reflns_observed_criterion             >3.0sigma(I)
_diffrn_reflns_av_R_equivalents        0.0632
_diffrn_reflns_av_sigmaI/netI          0.139
_diffrn_reflns_limit_h_min             0
_diffrn_reflns_limit_h_max             34
_diffrn_reflns_limit_k_min             0
_diffrn_reflns_limit_k_max             12
_diffrn_reflns_limit_l_min             -32
_diffrn_reflns_limit_l_max             26
_diffrn_reflns_theta_min               1.97
_diffrn_reflns_theta_max               68.11
_diffrn_reflns_reduction_process      'Lp corrections applied'
_diffrn_orient_matrix_UB_11           -0.01318
_diffrn_orient_matrix_UB_12            0.07680
_diffrn_orient_matrix_UB_13            0.01234
_diffrn_orient_matrix_UB_21            0.02979
_diffrn_orient_matrix_UB_22            0.05568
_diffrn_orient_matrix_UB_23            0.00183
_diffrn_orient_matrix_UB_31           -0.02634
_diffrn_orient_matrix_UB_32            0.02454
_diffrn_orient_matrix_UB_33           -0.04275
#------------------------------------------------------------------------------
loop_
_atom_type_symbol
_atom_type_oxidation_number
_atom_type_number_in_cell
_atom_type_scat_dispersion_real
_atom_type_scat_dispersion_imag
_atom_type_scat_source
  C  0   256 0.018 0.009 
;International Tables for Crystallography
(1992, Vol. C, Tables 4.2.6.8 and 6.1.1.1)
;
  H  0   272 0.000 0.000 
;International Tables for Crystallography
(1992, Vol. C, Table 6.1.1.2)
;
  N  0    32 0.031 0.018 
;International Tables for Crystallography
(1992, Vol. C, Tables 4.2.6.8 and 6.1.1.1)
;
  O  0    16 0.049 0.032 
;International Tables for Crystallography
(1992, Vol. C, Tables 4.2.6.8 and 6.1.1.1)
;
  I  0     8 -0.326 6.836 
;International Tables for Crystallography
(1992, Vol. C, Tables 4.2.6.8 and 6.1.1.1)
;
  Br 0    16 -0.676 1.280 
;International Tables for Crystallography
(1992, Vol. C, Tables 4.2.6.8 and 6.1.1.1)
;
  Zn 0     8 -1.549 0.678 
;International Tables for Crystallography
(1992, Vol. C, Tables 4.2.6.8 and 6.1.1.1)
;
#------------------------------------------------------------------------------
loop_
_atom_site_label
_atom_site_fract_x
_atom_site_fract_y
_atom_site_fract_z
_atom_site_U_iso_or_equiv
_atom_site_thermal_displace_type
_atom_site_calc_flag
_atom_site_calc_attached_atom
_atom_site_occupancy
_atom_site_refinement_flags
 I1     0.24699(4)  -0.04256(8) 0.20273(4)  0.0403(2)   Uani d . 1.00 .
 Br1    0.43638(6)  0.4691(2)   0.26801(7)  0.0547(5)   Uani d . 1.00 .
 Br2    0.55034(6)  0.2044(1)   0.34646(6)  0.0466(4)   Uani d . 1.00 .
 Zn1    0.5000      0.3359(3)   0.2500      0.0465(7)   Uani d . 0.50 S
 O1     0.4977(4)   -0.2844(9)  0.3923(4)   0.049(3)    Uani d . 1.00 .
 O2     0.3083(3)   0.3559(9)   -0.0022(4)  0.046(3)    Uani d . 1.00 .
 N1     0.3931(4)   0.0904(10)  0.3090(5)   0.037(3)    Uani d . 1.00 .
 N2     0.4096(4)   -0.3073(10) 0.3732(4)   0.035(3)    Uani d . 1.00 .
 N3     0.2911(4)   0.5071(10)  0.1527(4)   0.033(3)    Uani d . 1.00 .
 N4     0.3763(4)   0.4983(9)   0.0608(4)   0.029(3)    Uani d . 1.00 .
 C1     0.3998(6)   0.094(1)    0.2623(6)   0.049(4)    Uani d . 1.00 .
 C2     0.4221(7)   -0.009(2)   0.2504(7)   0.061(5)    Uani d . 1.00 .
 C3     0.4383(6)   -0.119(1)   0.2854(6)   0.049(4)    Uani d . 1.00 .
 C4     0.4311(5)   -0.121(1)   0.3331(5)   0.033(3)    Uani d . 1.00 .
 C5     0.4495(5)   -0.244(1)   0.3699(5)   0.031(3)    Uani d . 1.00 .
 C6     0.3582(5)   -0.236(1)   0.3592(6)   0.041(4)    Uani d . 1.00 .
 C7     0.3763(4)   -0.124(1)   0.4029(5)   0.032(3)    Uani d . 1.00 .
 C8     0.3695(5)   -0.134(1)   0.4507(6)   0.046(4)    Uani d . 1.00 .
 C9     0.3919(6)   -0.036(2)   0.4929(6)   0.055(5)    Uani d . 1.00 .
 C10    0.4219(6)   0.066(1)    0.4908(6)   0.050(4)    Uani d . 1.00 .
 C11    0.4288(5)   0.078(1)    0.4432(5)   0.040(3)    Uani d . 1.00 .
 C12    0.4036(5)   -0.017(1)   0.3977(5)   0.031(3)    Uani d . 1.00 .
 C13    0.4100(4)   -0.016(1)   0.3457(5)   0.029(3)    Uani d . 1.00 .
 C14    0.3603(6)   0.200(1)    0.3115(6)   0.050(4)    Uani d . 1.00 .
 C15    0.4243(6)   -0.429(1)   0.4066(8)   0.060(5)    Uani d . 1.00 .
 C16    0.4664(6)   0.185(1)    0.4458(7)   0.056(4)    Uani d . 1.00 .
 C17    0.2783(5)   0.387(1)    0.1624(6)   0.039(4)    Uani d . 1.00 .
 C18    0.2784(5)   0.280(1)    0.1329(6)   0.037(3)    Uani d . 1.00 .
 C19    0.2959(5)   0.295(1)    0.0936(5)   0.034(3)    Uani d . 1.00 .
 C20    0.3106(4)   0.418(1)    0.0841(5)   0.027(3)    Uani d . 1.00 .
 C21    0.3312(5)   0.422(1)    0.0430(5)   0.033(3)    Uani d . 1.00 .
 C22    0.4037(5)   0.573(1)    0.1164(5)   0.031(3)    Uani d . 1.00 .
 C23    0.3677(5)   0.688(1)    0.1089(4)   0.027(3)    Uani d . 1.00 .
 C24    0.3816(5)   0.817(1)    0.1052(5)   0.040(4)    Uani d . 1.00 .
 C25    0.3436(7)   0.916(1)    0.0907(6)   0.048(4)    Uani d . 1.00 .
 C26    0.2908(6)   0.889(1)    0.0784(6)   0.042(4)    Uani d . 1.00 .
 C27    0.2753(5)   0.761(1)    0.0825(5)   0.028(3)    Uani d . 1.00 .
 C28    0.3151(4)   0.664(1)    0.1001(4)   0.023(3)    Uani d . 1.00 .
 C29    0.3054(4)   0.528(1)    0.1127(5)   0.027(3)    Uani d . 1.00 .
 C30    0.2961(6)   0.615(1)    0.1936(6)   0.050(4)    Uani d . 1.00 .
 C31    0.3999(6)   0.498(1)    0.0247(6)   0.049(4)    Uani d . 1.00 .
 C32    0.2163(5)   0.736(1)    0.0628(6)   0.045(4)    Uani d . 1.00 .
 H1     0.3885      0.1721      0.2377      0.0608      Uiso calc . 1.00 .
 H2     0.4273      -0.0051     0.2173      0.0707      Uiso calc . 1.00 .
 H3     0.4536      -0.1950     0.2766      0.0585      Uiso calc . 1.00 .
 H4     0.3335      -0.2956     0.3621      0.0498      Uiso calc . 1.00 .
 H5     0.3387      -0.2051     0.3189      0.0498      Uiso calc . 1.00 .
 H6     0.3494      -0.2079     0.4537      0.0566      Uiso calc . 1.00 .
 H7     0.3859      -0.0390     0.5251      0.0626      Uiso calc . 1.00 .
 H8     0.4383      0.1302      0.5226      0.0613      Uiso calc . 1.00 .
 H9     0.3782      0.2826      0.3150      0.0633      Uiso calc . 1.00 .
 H10    0.3578      0.1910      0.3457      0.0633      Uiso calc . 1.00 .
 H11    0.3235      0.2023      0.2768      0.0633      Uiso calc . 1.00 .
 H12    0.3923      -0.4632     0.4060      0.0743      Uiso calc . 1.00 .
 H13    0.4534      -0.4139     0.4477      0.0743      Uiso calc . 1.00 .
 H14    0.4365      -0.4927     0.3908      0.0743      Uiso calc . 1.00 .
 H15    0.4674      0.1839      0.4102      0.0673      Uiso calc . 1.00 .
 H16    0.5037      0.1749      0.4791      0.0673      Uiso calc . 1.00 .
 H17    0.4529      0.2696      0.4478      0.0673      Uiso calc . 1.00 .
 H18    0.2688      0.3763      0.1916      0.0483      Uiso calc . 1.00 .
 H19    0.2658      0.1959      0.1374      0.0467      Uiso calc . 1.00 .
 H20    0.2985      0.2194      0.0729      0.0405      Uiso calc . 1.00 .
 H21    0.4396      0.6028      0.1261      0.0393      Uiso calc . 1.00 .
 H22    0.4091      0.5185      0.1482      0.0393      Uiso calc . 1.00 .
 H23    0.4184      0.8369      0.1134      0.0466      Uiso calc . 1.00 .
 H24    0.3533      1.0052      0.0886      0.0580      Uiso calc . 1.00 .
 H25    0.2632      0.9582      0.0662      0.0495      Uiso calc . 1.00 .
 H26    0.3060      0.6965      0.1836      0.0615      Uiso calc . 1.00 .
 H27    0.3260      0.5948      0.2343      0.0615      Uiso calc . 1.00 .
 H28    0.2627      0.6263      0.1924      0.0615      Uiso calc . 1.00 .
 H29    0.4112      0.4119      0.0219      0.0596      Uiso calc . 1.00 .
 H30    0.4321      0.5542      0.0421      0.0596      Uiso calc . 1.00 .
 H31    0.3730      0.5292      -0.0144     0.0596      Uiso calc . 1.00 .
 H32    0.1913      0.7601      0.0216      0.0554      Uiso calc . 1.00 .
 H33    0.2065      0.7877      0.0857      0.0554      Uiso calc . 1.00 .
 H34    0.2104      0.6462      0.0670      0.0554      Uiso calc . 1.00 .

loop_
_atom_site_aniso_label
_atom_site_aniso_U_11
_atom_site_aniso_U_22
_atom_site_aniso_U_33
_atom_site_aniso_U_12
_atom_site_aniso_U_13
_atom_site_aniso_U_23
 I(1)   0.0462(5)   0.0404(4)   0.0427(4)   0.0030(4)   0.0296(4)   -0.0011(4) 
 Br(1)  0.0418(8)   0.071(1)    0.0526(9)   0.0041(8)   0.0266(7)   -0.0037(8) 
 Br(2)  0.0389(7)   0.0440(8)   0.0384(7)   0.0039(6)   0.0092(6)   0.0054(6)  
 Zn(1)  0.049(1)    0.056(2)    0.034(1)    0.0021      0.022(1)    0.0023     
 O(1)   0.038(5)    0.057(6)    0.061(6)    0.013(5)    0.032(5)    0.005(5)   
 O(2)   0.043(5)    0.053(6)    0.051(5)    -0.017(4)   0.033(4)    -0.028(5)  
 N(1)   0.026(5)    0.035(6)    0.041(6)    0.000(4)    0.011(5)    0.002(5)   
 N(2)   0.029(5)    0.039(6)    0.037(6)    -0.003(5)   0.018(5)    0.007(5)   
 N(3)   0.036(5)    0.035(6)    0.040(6)    0.001(4)    0.028(5)    0.001(4)   
 N(4)   0.026(5)    0.036(5)    0.028(5)    -0.002(4)   0.017(4)    0.000(4)   
 C(1)   0.060(9)    0.052(8)    0.033(7)    -0.008(7)   0.023(7)    0.007(6)   
 C(2)   0.07(1)     0.08(1)     0.042(8)    -0.020(9)   0.041(8)    -0.008(8)  
 C(3)   0.060(9)    0.057(9)    0.049(8)    -0.019(7)   0.042(7)    -0.014(7)  
 C(4)   0.027(6)    0.042(7)    0.039(7)    -0.009(5)   0.023(5)    -0.003(6)  
 C(5)   0.029(6)    0.040(7)    0.032(6)    0.004(5)    0.021(5)    -0.008(5)  
 C(6)   0.031(6)    0.046(8)    0.053(8)    -0.003(6)   0.028(6)    0.005(6)   
 C(7)   0.019(5)    0.037(6)    0.044(7)    0.009(5)    0.021(5)    0.006(6)   
 C(8)   0.039(7)    0.057(9)    0.056(8)    0.016(6)    0.036(7)    0.015(7)   
 C(9)   0.059(9)    0.08(1)     0.046(8)    0.015(9)    0.039(7)    -0.005(8)  
 C(10)  0.050(8)    0.058(9)    0.039(7)    0.015(7)    0.022(7)    -0.012(7)  
 C(11)  0.034(7)    0.039(7)    0.034(7)    0.010(6)    0.011(6)    -0.003(5)  
 C(12)  0.024(5)    0.032(7)    0.037(6)    0.012(5)    0.017(5)    0.003(5)   
 C(13)  0.024(5)    0.032(6)    0.028(6)    -0.002(5)   0.013(5)    0.005(5)   
 C(14)  0.058(9)    0.038(8)    0.044(8)    0.009(7)    0.022(7)    0.007(6)   
 C(15)  0.051(9)    0.046(9)    0.08(1)     0.015(7)    0.038(9)    0.024(8)   
 C(16)  0.049(8)    0.047(9)    0.067(10)   0.000(7)    0.028(8)    -0.011(8)  
 C(17)  0.033(6)    0.048(8)    0.045(7)    -0.009(6)   0.027(6)    0.005(6)   
 C(18)  0.022(6)    0.036(7)    0.052(8)    -0.006(5)   0.019(6)    0.001(6)   
 C(19)  0.025(6)    0.039(7)    0.038(7)    -0.005(5)   0.017(5)    -0.010(6)  
 C(20)  0.021(5)    0.033(6)    0.022(5)    -0.005(5)   0.009(5)    -0.001(4)  
 C(21)  0.033(6)    0.037(7)    0.033(6)    0.009(5)    0.021(5)    0.000(5)   
 C(22)  0.028(6)    0.034(7)    0.036(6)    -0.008(5)   0.020(5)    -0.004(5)  
 C(23)  0.034(6)    0.030(6)    0.019(5)    -0.011(5)   0.016(5)    -0.012(4)  
 C(24)  0.051(8)    0.045(8)    0.034(7)    -0.014(6)   0.030(6)    -0.011(6)  
 C(25)  0.08(1)     0.033(7)    0.051(8)    -0.006(7)   0.053(8)    -0.003(6)  
 C(26)  0.060(9)    0.032(7)    0.043(7)    0.011(6)    0.034(7)    0.008(6)   
 C(27)  0.033(6)    0.031(6)    0.023(5)    0.004(5)    0.017(5)    -0.002(5)  
 C(28)  0.025(5)    0.031(6)    0.020(5)    -0.004(5)   0.016(5)    -0.009(4)  
 C(29)  0.015(5)    0.036(6)    0.026(5)    -0.003(5)   0.008(4)    0.003(5)   
 C(30)  0.064(9)    0.058(9)    0.052(8)    -0.007(8)   0.047(8)    -0.009(7)  
 C(31)  0.058(9)    0.063(9)    0.052(8)    -0.008(7)   0.047(8)    -0.011(7)  
 C(32)  0.036(7)    0.052(8)    0.044(7)    0.012(6)    0.020(6)    -0.003(6)  
#------------------------------------------------------------------------------
_refine_ls_structure_factor_coef       F
_refine_ls_matrix_type                 full
_refine_ls_weighting_scheme            'w = 1/[\s^2^(Fo) + 0.00063|Fo|^2^]'
_refine_ls_hydrogen_treatment          noref
_refine_ls_extinction_method           none
_refine_ls_extinction_coef             ?
_refine_ls_number_reflns               3614
_refine_ls_number_parameters           375
_refine_ls_number_restraints           0
_refine_ls_number_constraints          0
_refine_ls_R_factor_all                0.1189
_refine_ls_R_factor_obs                0.0659
_refine_ls_wR_factor_all               0.0945
_refine_ls_wR_factor_obs               0.0826
_refine_ls_goodness_of_fit_all         1.431
_refine_ls_goodness_of_fit_obs         1.588
_refine_ls_shift/esd_max               0.0000
_refine_ls_shift/esd_mean              0.0000
_refine_diff_density_min               -2.05
_refine_diff_density_max               2.12
#------------------------------------------------------------------------------
loop_
_geom_bond_atom_site_label_1
_geom_bond_atom_site_label_2
_geom_bond_distance
_geom_bond_site_symmetry_1
_geom_bond_site_symmetry_2
_geom_bond_publ_flag
 Br(1)     Zn(1)     2.514(2)   1_555 1_555 no
 Br(2)     Zn(1)     2.548(2)   1_555 1_555 no
 O(1)      C(5)      1.23(1)    1_555 1_555 no
 O(2)      C(21)     1.22(1)    1_555 1_555 no
 N(1)      C(1)      1.37(2)    1_555 1_555 no
 N(1)      C(13)     1.36(1)    1_555 1_555 no
 N(1)      C(14)     1.48(2)    1_555 1_555 no
 N(2)      C(5)      1.35(1)    1_555 1_555 no
 N(2)      C(6)      1.49(1)    1_555 1_555 no
 N(2)      C(15)     1.45(2)    1_555 1_555 no
 N(3)      C(17)     1.35(2)    1_555 1_555 no
 N(3)      C(29)     1.35(1)    1_555 1_555 no
 N(3)      C(30)     1.50(2)    1_555 1_555 no
 N(4)      C(21)     1.35(1)    1_555 1_555 no
 N(4)      C(22)     1.46(1)    1_555 1_555 no
 N(4)      C(31)     1.45(1)    1_555 1_555 no
 C(1)      C(2)      1.35(2)    1_555 1_555 no
 C(2)      C(3)      1.38(2)    1_555 1_555 no
 C(3)      C(4)      1.40(2)    1_555 1_555 no
 C(4)      C(5)      1.51(2)    1_555 1_555 no
 C(4)      C(13)     1.36(2)    1_555 1_555 no
 C(6)      C(7)      1.51(2)    1_555 1_555 no
 C(7)      C(8)      1.40(2)    1_555 1_555 no
 C(7)      C(12)     1.40(2)    1_555 1_555 no
 C(8)      C(9)      1.38(2)    1_555 1_555 no
 C(9)      C(10)     1.37(2)    1_555 1_555 no
 C(10)     C(11)     1.40(2)    1_555 1_555 no
 C(11)     C(12)     1.41(2)    1_555 1_555 no
 C(11)     C(16)     1.50(2)    1_555 1_555 no
 C(12)     C(13)     1.50(1)    1_555 1_555 no
 C(17)     C(18)     1.34(2)    1_555 1_555 no
 C(18)     C(19)     1.40(2)    1_555 1_555 no
 C(19)     C(20)     1.39(2)    1_555 1_555 no
 C(20)     C(21)     1.50(1)    1_555 1_555 no
 C(20)     C(29)     1.41(2)    1_555 1_555 no
 C(22)     C(23)     1.50(2)    1_555 1_555 no
 C(23)     C(24)     1.39(2)    1_555 1_555 no
 C(23)     C(28)     1.41(1)    1_555 1_555 no
 C(24)     C(25)     1.37(2)    1_555 1_555 no
 C(25)     C(26)     1.38(2)    1_555 1_555 no
 C(26)     C(27)     1.40(2)    1_555 1_555 no
 C(27)     C(28)     1.38(1)    1_555 1_555 no
 C(27)     C(32)     1.48(2)    1_555 1_555 no
 C(28)     C(29)     1.49(1)    1_555 1_555 no
#------------------------------------------------------------------------------
loop_
_geom_angle_atom_site_label_1
_geom_angle_atom_site_label_2
_geom_angle_atom_site_label_3
_geom_angle
_geom_angle_site_symmetry_1
_geom_angle_site_symmetry_2
_geom_angle_site_symmetry_3
_geom_angle_publ_flag
   Br(1)     Zn(1)     Br(1)     114.5(1)   1_555 1_555 2_655 no
   Br(1)     Zn(1)     Br(2)     98.96(5)   1_555 1_555 1_555 no
   Br(1)     Zn(1)     Br(2)     114.46(5)  1_555 1_555 2_655 no
   Br(1)     Zn(1)     Br(2)     114.46(5)  2_655 1_555 1_555 no
   Br(1)     Zn(1)     Br(2)     98.96(5)   2_655 1_555 2_655 no
   Br(2)     Zn(1)     Br(2)     116.5(1)   1_555 1_555 2_655 no
   C(1)      N(1)      C(13)     120(1)     1_555 1_555 1_555 no
   C(1)      N(1)      C(14)     115(1)     1_555 1_555 1_555 no
   C(13)     N(1)      C(14)     123(1)     1_555 1_555 1_555 no
   C(5)      N(2)      C(6)      119.9(10)  1_555 1_555 1_555 no
   C(5)      N(2)      C(15)     118(1)     1_555 1_555 1_555 no
   C(6)      N(2)      C(15)     119.3(10)  1_555 1_555 1_555 no
   C(17)     N(3)      C(29)     121(1)     1_555 1_555 1_555 no
   C(17)     N(3)      C(30)     117.0(10)  1_555 1_555 1_555 no
   C(29)     N(3)      C(30)     120.9(10)  1_555 1_555 1_555 no
   C(21)     N(4)      C(22)     122.5(9)   1_555 1_555 1_555 no
   C(21)     N(4)      C(31)     117.5(10)  1_555 1_555 1_555 no
   C(22)     N(4)      C(31)     119.9(9)   1_555 1_555 1_555 no
   N(1)      C(1)      C(2)      120(1)     1_555 1_555 1_555 no
   N(1)      C(1)      H(1)      118(1)     1_555 1_555 1_555 no
   C(2)      C(1)      H(1)      120(1)     1_555 1_555 1_555 no
   C(1)      C(2)      C(3)      120(1)     1_555 1_555 1_555 no
   C(1)      C(2)      H(2)      120(1)     1_555 1_555 1_555 no
   C(3)      C(2)      H(2)      119(1)     1_555 1_555 1_555 no
   C(2)      C(3)      C(4)      118(1)     1_555 1_555 1_555 no
   C(2)      C(3)      H(3)      120(1)     1_555 1_555 1_555 no
   C(4)      C(3)      H(3)      121(1)     1_555 1_555 1_555 no
   C(3)      C(4)      C(5)      115(1)     1_555 1_555 1_555 no
   C(3)      C(4)      C(13)     121(1)     1_555 1_555 1_555 no
   C(5)      C(4)      C(13)     122(1)     1_555 1_555 1_555 no
   O(1)      C(5)      N(2)      124(1)     1_555 1_555 1_555 no
   O(1)      C(5)      C(4)      119(1)     1_555 1_555 1_555 no
   N(2)      C(5)      C(4)      115.8(10)  1_555 1_555 1_555 no
   N(2)      C(6)      C(7)      107.6(9)   1_555 1_555 1_555 no
   N(2)      C(6)      H(4)      109(1)     1_555 1_555 1_555 no
   N(2)      C(6)      H(5)      109(1)     1_555 1_555 1_555 no
   C(7)      C(6)      H(4)      111(1)     1_555 1_555 1_555 no
   C(7)      C(6)      H(5)      111(1)     1_555 1_555 1_555 no
   H(4)      C(6)      H(5)      107(1)     1_555 1_555 1_555 no
   C(6)      C(7)      C(8)      119(1)     1_555 1_555 1_555 no
   C(6)      C(7)      C(12)     119(1)     1_555 1_555 1_555 no
   C(8)      C(7)      C(12)     120(1)     1_555 1_555 1_555 no
   C(7)      C(8)      C(9)      117(1)     1_555 1_555 1_555 no
   C(7)      C(8)      H(6)      120(1)     1_555 1_555 1_555 no
   C(9)      C(8)      H(6)      121(1)     1_555 1_555 1_555 no
   C(8)      C(9)      C(10)     122(1)     1_555 1_555 1_555 no
   C(8)      C(9)      H(7)      118(1)     1_555 1_555 1_555 no
   C(10)     C(9)      H(7)      118(1)     1_555 1_555 1_555 no
   C(9)      C(10)     C(11)     120(1)     1_555 1_555 1_555 no
   C(9)      C(10)     H(8)      119(1)     1_555 1_555 1_555 no
   C(11)     C(10)     H(8)      120(1)     1_555 1_555 1_555 no
   C(10)     C(11)     C(12)     117(1)     1_555 1_555 1_555 no
   C(10)     C(11)     C(16)     118(1)     1_555 1_555 1_555 no
   C(12)     C(11)     C(16)     123(1)     1_555 1_555 1_555 no
   C(7)      C(12)     C(11)     120(1)     1_555 1_555 1_555 no
   C(7)      C(12)     C(13)     117(1)     1_555 1_555 1_555 no
   C(11)     C(12)     C(13)     122(1)     1_555 1_555 1_555 no
   N(1)      C(13)     C(4)      118(1)     1_555 1_555 1_555 no
   N(1)      C(13)     C(12)     120(1)     1_555 1_555 1_555 no
   C(4)      C(13)     C(12)     121(1)     1_555 1_555 1_555 no
   N(1)      C(14)     H(9)      110(1)     1_555 1_555 1_555 no
   N(1)      C(14)     H(10)     110(1)     1_555 1_555 1_555 no
   N(1)      C(14)     H(11)     111(1)     1_555 1_555 1_555 no
   H(9)      C(14)     H(10)     107(1)     1_555 1_555 1_555 no
   H(9)      C(14)     H(11)     108(1)     1_555 1_555 1_555 no
   H(10)     C(14)     H(11)     108(1)     1_555 1_555 1_555 no
   N(2)      C(15)     H(12)     110(1)     1_555 1_555 1_555 no
   N(2)      C(15)     H(13)     110(1)     1_555 1_555 1_555 no
   N(2)      C(15)     H(14)     111(1)     1_555 1_555 1_555 no
   H(12)     C(15)     H(13)     106(1)     1_555 1_555 1_555 no
   H(12)     C(15)     H(14)     108(1)     1_555 1_555 1_555 no
   H(13)     C(15)     H(14)     109(1)     1_555 1_555 1_555 no
   C(11)     C(16)     H(15)     110(1)     1_555 1_555 1_555 no
   C(11)     C(16)     H(16)     111(1)     1_555 1_555 1_555 no
   C(11)     C(16)     H(17)     111(1)     1_555 1_555 1_555 no
   H(15)     C(16)     H(16)     107(1)     1_555 1_555 1_555 no
   H(15)     C(16)     H(17)     107(1)     1_555 1_555 1_555 no
   H(16)     C(16)     H(17)     109(1)     1_555 1_555 1_555 no
   N(3)      C(17)     C(18)     122(1)     1_555 1_555 1_555 no
   N(3)      C(17)     H(18)     118(1)     1_555 1_555 1_555 no
   C(18)     C(17)     H(18)     118(1)     1_555 1_555 1_555 no
   C(17)     C(18)     C(19)     118(1)     1_555 1_555 1_555 no
   C(17)     C(18)     H(19)     121(1)     1_555 1_555 1_555 no
   C(19)     C(18)     H(19)     119(1)     1_555 1_555 1_555 no
   C(18)     C(19)     C(20)     119(1)     1_555 1_555 1_555 no
   C(18)     C(19)     H(20)     120(1)     1_555 1_555 1_555 no
   C(20)     C(19)     H(20)     119(1)     1_555 1_555 1_555 no
   C(19)     C(20)     C(21)     115(1)     1_555 1_555 1_555 no
   C(19)     C(20)     C(29)     119.3(10)  1_555 1_555 1_555 no
   C(21)     C(20)     C(29)     124(1)     1_555 1_555 1_555 no
   O(2)      C(21)     N(4)      124(1)     1_555 1_555 1_555 no
   O(2)      C(21)     C(20)     120(1)     1_555 1_555 1_555 no
   N(4)      C(21)     C(20)     115.9(10)  1_555 1_555 1_555 no
   N(4)      C(22)     C(23)     109.1(9)   1_555 1_555 1_555 no
   N(4)      C(22)     H(21)     109.8(10)  1_555 1_555 1_555 no
   N(4)      C(22)     H(22)     109.9(10)  1_555 1_555 1_555 no
   C(23)     C(22)     H(21)     109.7(10)  1_555 1_555 1_555 no
   C(23)     C(22)     H(22)     110.0(10)  1_555 1_555 1_555 no
   H(21)     C(22)     H(22)     108(1)     1_555 1_555 1_555 no
   C(22)     C(23)     C(24)     123(1)     1_555 1_555 1_555 no
   C(22)     C(23)     C(28)     118.0(9)   1_555 1_555 1_555 no
   C(24)     C(23)     C(28)     118(1)     1_555 1_555 1_555 no
   C(23)     C(24)     C(25)     120(1)     1_555 1_555 1_555 no
   C(23)     C(24)     H(23)     119(1)     1_555 1_555 1_555 no
   C(25)     C(24)     H(23)     120(1)     1_555 1_555 1_555 no
   C(24)     C(25)     C(26)     120(1)     1_555 1_555 1_555 no
   C(24)     C(25)     H(24)     120(1)     1_555 1_555 1_555 no
   C(26)     C(25)     H(24)     118(1)     1_555 1_555 1_555 no
   C(25)     C(26)     C(27)     120(1)     1_555 1_555 1_555 no
   C(25)     C(26)     H(25)     120(1)     1_555 1_555 1_555 no
   C(27)     C(26)     H(25)     118(1)     1_555 1_555 1_555 no
   C(26)     C(27)     C(28)     117(1)     1_555 1_555 1_555 no
   C(26)     C(27)     C(32)     118(1)     1_555 1_555 1_555 no
   C(28)     C(27)     C(32)     124(1)     1_555 1_555 1_555 no
   C(23)     C(28)     C(27)     121(1)     1_555 1_555 1_555 no
   C(23)     C(28)     C(29)     116.1(9)   1_555 1_555 1_555 no
   C(27)     C(28)     C(29)     121.9(10)  1_555 1_555 1_555 no
   N(3)      C(29)     C(20)     118(1)     1_555 1_555 1_555 no
   N(3)      C(29)     C(28)     119.8(10)  1_555 1_555 1_555 no
   C(20)     C(29)     C(28)     122.1(9)   1_555 1_555 1_555 no
   N(3)      C(30)     H(26)     110(1)     1_555 1_555 1_555 no
   N(3)      C(30)     H(27)     110(1)     1_555 1_555 1_555 no
   N(3)      C(30)     H(28)     112(1)     1_555 1_555 1_555 no
   H(26)     C(30)     H(27)     106(1)     1_555 1_555 1_555 no
   H(26)     C(30)     H(28)     108(1)     1_555 1_555 1_555 no
   H(27)     C(30)     H(28)     108(1)     1_555 1_555 1_555 no
   N(4)      C(31)     H(29)     110(1)     1_555 1_555 1_555 no
   N(4)      C(31)     H(30)     109(1)     1_555 1_555 1_555 no
   N(4)      C(31)     H(31)     110(1)     1_555 1_555 1_555 no
   H(29)     C(31)     H(30)     108(1)     1_555 1_555 1_555 no
   H(29)     C(31)     H(31)     109(1)     1_555 1_555 1_555 no
   H(30)     C(31)     H(31)     108(1)     1_555 1_555 1_555 no
   C(27)     C(32)     H(32)     110(1)     1_555 1_555 1_555 no
   C(27)     C(32)     H(33)     110(1)     1_555 1_555 1_555 no
   C(27)     C(32)     H(34)     111(1)     1_555 1_555 1_555 no
   H(32)     C(32)     H(33)     107(1)     1_555 1_555 1_555 no
   H(32)     C(32)     H(34)     108(1)     1_555 1_555 1_555 no
   H(33)     C(32)     H(34)     108(1)     1_555 1_555 1_555 no
#------------------------------------------------------------------------------
